# Supplementary material for: The Impact of Potassium Dynamics on Cardiomyocyte Beating in Hemodialysis Treatment
Source: MDPI journal article supplement (doi:10.3390/jcm13082289), 2024-04-15
Supplement: s1 [file s1]

## Supplementary Materials

Table S1. Initial conditions for mathematical model of sinoatrial nodal cells

|                                                                            |                  |
|----------------------------------------------------------------------------|------------------|
| K <sup>+</sup> concentration in interstitial fluid ( $K_I$ )               | 4.8 mM [15]      |
| K <sup>+</sup> concentration in cytosol ( $K_C$ )                          | 140.0 mM [15]    |
| Na <sup>+</sup> concentration in interstitial fluid ( $Na_I$ )             | 140.0 mM [15]    |
| Na <sup>+</sup> concentration in cytosol ( $Na_C$ )                        | 10.0 mM [15]     |
| Ca <sup>2+</sup> concentration in plasma ( $Ca_P$ )                        | 1.150 mM         |
| Ca <sup>2+</sup> concentration in interstitial fluid ( $Ca_I$ )            | 1.085 mM         |
| Ca <sup>2+</sup> concentration in cytosol ( $Ca_C$ )                       | 0.0001 mM [15]   |
| Ca <sup>2+</sup> concentration in subspace ( $Ca_S$ )                      | 0.000223 mM [15] |
| Ca <sup>2+</sup> concentration in junctional sarcoplasmic reticulum (JSR)  | 0.029 mM [15]    |
| Ca <sup>2+</sup> concentration in network sarcoplasmic reticulum (NSR)     | 1.35 mM [15]     |
| Membrane voltage                                                           | -65.0 mV         |
| Gate opening stochasticity                                                 |                  |
| Funny channel y (active state)                                             | 1.0              |
| L type Ca channel dL (active state)                                        | 0.0              |
| L type Ca channel fL (inactive state)                                      | 1.0              |
| L type Ca channel fC(inactive state)                                       | 0.0              |
| T type Ca channel dT (active state)                                        | 0.0              |
| T type Ca channel fT(inactive state)                                       | 1.0              |
| Ks channel n (active state)                                                | 0.0              |
| Kr channel PaF (active state)                                              | 0.0              |
| Kr channel PaS (active state)                                              | 0.0              |
| Kr channel Pi (inactive state)                                             | 1.0              |
| Sustained qa (active state)                                                | 0.0              |
| Sustained qi (inactive state)                                              | 1.0              |
| 4AP channel q (inactive state)                                             | 1.0              |
| 4AP channel r (active state)                                               | 0.0              |
| ryanodine receptor R (closed state)                                        | 0.75             |
| ryanodine receptor I (inactive state)                                      | 0.11E-5          |
| ryanodine receptor O (open state)                                          | 0.34E-6          |
| ryanodine receptor RI (refractory state)                                   | 0.25             |
| Ca <sup>2+</sup> buffering                                                 |                  |
| Troponin_Ca (for Ca <sup>2+</sup> binding) ( $TC_{tot}$ )                  | 0.031 mM [15]    |
| Fraction of Troponin_Ca and Ca <sup>2+</sup> complex in cytosol ( $fTC$ )  | 2.0 %            |
| Troponin_Mg (for Mg <sup>2+</sup> binding) ( $TMC_{tot}$ )                 | 0.062 mM [15]    |
| Fraction of Troponin_Mg and Ca <sup>2+</sup> complex in cytosol ( $fTMC$ ) | 22.0 %           |
| Fraction of Troponin_Mg and Mg <sup>2+</sup> complex in cytosol ( $fTMM$ ) | 69.0 %           |
| Calsequestrin ( $CQ_{tot}$ )                                               | 10.0 mM [13]     |
| Fraction of Calsequestrin and Ca <sup>2+</sup> complex in JSR ( $fCQ$ )    | 22.0 %           |
| Calmodulin ( $CM_{tot}$ )                                                  | 0.045 mM [13]    |
| Fraction of Calmodulin and Ca <sup>2+</sup> complex in cytosol ( $fCMi$ )  | 4.2 %            |
| Fraction of Calmodulin and Ca <sup>2+</sup> complex in subspace ( $fCMS$ ) | 8.9 %            |

Table S2. Constants for mathematical model of sinoatrial nodal cells

|                                                        |                    |
|--------------------------------------------------------|--------------------|
| Cellular electric capacitance ( $C_m$ )                | 32.0 pF [15]       |
| Faraday constant ( $F$ )                               | 96485.0 C/mol [15] |
| Cell volume ( $V_{cell}$ )                             | 3.518 pL [13]      |
| Subspace volume ( $V_{sub}$ )                          | 0.035 pL [13]      |
| Cytosol volume ( $V_{cyt}$ )                           | 1.583 pL [13]      |
| Network sarcoplasmic reticulum volume ( $V_{NSR}$ )    | 0.041 pL [13]      |
| Junctional sarcoplasmic reticulum volume ( $V_{JSR}$ ) | 0.004 pL [13]      |
| Mg <sup>2+</sup> concentration in cytosol              | 2.5 mM [15]        |
| Single channel conductance (siemens)                   |                    |
| funny channel                                          | 0.5 pS [14]        |
| L type Ca channel                                      | 3.6 pS [14]        |
| T type Ca channel                                      | 5.8 pS [14]        |
| K channel                                              | 2.9 pS [14]        |
| Whole cell conductance (siemens)                       |                    |
| funny channel                                          | 4.8 nS [15]        |
| L type Ca channel                                      | 18.56 nS [13]      |
| T type Ca channel                                      | 5.86 nS [15]       |
| Ks channel                                             | 0.83 nS [13]       |
| Kr channel                                             | 2.60 nS [15]       |
| Sustained channel                                      | 0.096 nS [15]      |
| 4AP channel                                            | 8.06 nS [15]       |
| The number of channels in cell                         |                    |
| funny channel ( $nf$ )                                 | 9600               |
| L type Ca channel ( $nLCa$ )                           | 5156               |
| T type Ca channel ( $nTCa$ )                           | 1011               |
| Ks channel ( $nKs$ )                                   | 286                |
| Kr channel ( $nKr$ )                                   | 895                |
| Sustained channel ( $nSus$ )                           | 1000               |
| 4AP channel ( $n4AP$ )                                 | 1000               |
| ryanodine receptors in cell ( $nrr$ )                  | 135000 [15]        |

Table S3. Mathematical equations of sinoatrial nodal cells

Membrane potential ( $V_m$ )

$$dV_m/dt = -I_{tot}/C_m$$

Membrane current ( $I_{tot}$ )

$$I_{tot} = I_{LCa} + I_{TCa} + I_{Kr} + I_{Ks} + I_{to} + I_{ss} + I_{fNa} + I_{fK} + I_{st} + I_{NaK} + I_{NCX} + I_{bNa} + I_{bCa}$$

funny current ( $I_f = I_{fNa} + I_{fK}$ ) [15,13]

$$y_i = 1.0/(1.0 + \exp((V_m + 64.0)/13.5))$$

$$T_y = 0.7166529/(\exp(-(V_m + 386.9)/45.302) + \exp((V_m - 73.08)/19.231))$$

$$dy/dt = (t_i - y) * T_y$$

$$ENa = 26.7266 * \log(Na_i / Na_o)$$

$$EK = 26.7266 * \log(K_i / K_o)$$

$$I_{fNa} = C_m * 0.3833 * 0.15 * (V_m - ENa) * y^2$$

$$I_{fK} = C_m * 0.6167 * 0.15 * (V_m - EK) * y^2$$

$$I_f = I_{fNa} + I_{fK}$$

L-type Ca current ( $I_{LCa}$ ) [15,13]

$$dLi = 1.0/(1.0 + \exp(-(V_m + 13.5)/6.0))$$

$$adL = -0.02839 * (V_m + 35.0) / (\exp(-(V_m + 35.0)/2.5) - 1.0) - 0.0849 * V_m / (\exp(-V_m/4.8) - 1.0)$$

$$bdL = 0.01143 * (V_m - 5.0) / (\exp(V_m - 5.0)/2.5 - 1.0)$$

$$TdL = 1.0/(adL + bdL)$$

$$ddL/dt = (dLi - dL) * TdL$$

$$fLi = 1.0/(1.0 + \exp((V_m + 35.0)/7.3))$$

$$TfL = 257.1 * \exp(-(V_m + 32.5)/13.9^2) + 44.3$$

$$dfL/dt = (fLi - fL) * TfL$$

$$fCai = 0.00035/(0.00035 + Ca_o)$$

$$TfCa = fCai/0.021$$

$$dfC/dt = (fCai - fC) * TfCa$$

$$I_{LCa} = C_m * 0.58 * (V_m - 45.0) * dL * fL * fC$$

T-type Ca current ( $I_{TCa}$ ) [15,13]

$$dT_i = 1.0/(1.0 + \exp(-(V_m + 26.3)/6.0))$$

$$TdT = 1.0/(1.068 * \exp((V_m + 26.3)/30.0) + 1.068 * \exp(-(V_m + 26.3)/30.0))$$

$$ddT/dt = (dT_i - dT) * TdT$$

$$fTi = 1.0/(1.0 + \exp((V_m + 61.7)/5.6))$$

$$TfT = 1.0/(0.0153 * \exp(-(V_m + 61.7)/83.3) + 0.015 * \exp((V_m + 61.7)/15.38))$$

$$dfT/dt = (fTi - fT) * TfT$$

$$I_{TCa} = C_m * 0.1832 * (V_m - 45.0) * dT * fT$$

Kr current ( $I_{Kr}$ ) [15,13]

$$Pai = 1.0/(1.0 + \exp(-(V_m + 23.2)/10.6))$$

$$TPai = 0.8466/(0.0372 * \exp(V_m/15.9) + 0.00096 * \exp(-V_m/22.5))$$

$$dPaF/dt = (Pai - PaF) * TPai$$

$$TPaS = 0.8466/(0.0042 * \exp(V_m/17.0) + 0.00015 * \exp(-V_m/21.6))$$

$$dPaS/dt = (Pai - PaS) * TPaS$$

$$Pii = 1.0/(1.0 + \exp((V_m + 28.6)/17.1))$$

$$TPii = 1.0/(0.1 * \exp(-V_m/54.645) + 0.656 * \exp(V_m/106.157))$$

$$dPi/dt = (Pii - Pi) * TPii$$

$$EK = 26.7266 * \log(K_i / K_o)$$

$$I_{Kr} = C_m * 0.08114 * (V_m - EK) * (0.6 * PaF + 0.4 * PaS) * Pi$$

---

Ks current ( $I_{Ks}$ ) [15,13]

$$\begin{aligned} Ksa &= 0.014/(1.0+\exp(-(V_m-40.0)/9.0)) \\ Ksb &= 0.001*\exp(-V_m/45.0) \\ ni &= Ksa/(Ksa+Ksb) \\ Tn &= 1.0/(Ksa+Ksb) \\ dn/dt &= (ni - n) * Tn \\ EKs &= 26.7266*\log((K_I+0.12*Na_I)/(K_C+0.12*Na_C)) \\ I_{Ks} &= C_m * 0.0259 * (V_m - EKs)*n^2 \end{aligned}$$

Sustained inward current ( $I_{st}$ ) [15,13]

$$\begin{aligned} qai &= 1.0/(1.0+\exp(-(V_m+57.0)/5.0)) \\ aqa &= 1.0/(0.15*\exp(-V_m/11.0)+0.2*\exp(-V_m/700.0)) \\ bqa &= 1.0/(16.0*\exp(V_m/8.0)+15.0*\exp(V_m/50.0)) \\ Tqa &= 1.0/(aqa+bqa) \\ dqa/dt &= (qai - qa) * Tqa \\ aqi &= 1.0/(3100.0*\exp(V_m/13.0)+700.0*\exp(V_m/70.0)) \\ bqi &= 1.0/(95.0*\exp(-V_m/10.0)+50.0*\exp(-V_m/700.0))+0.000229/(1.0+\exp(-V_m/5.0)) \\ qii &= aqi / (aqi+bqi) \\ Tqi &= 6.65 / (aqi+bqi) \\ dqi/dt &= (qii - qi) * Tqi \\ I_{st} &= C_m * 0.003 * (V_m - 37.4)*qa*qi \end{aligned}$$

4-aminopyridine-sensitive current ( $I_{4AP} = I_{to} + I_{ss}$ ) [15,13]

$$\begin{aligned} qi &= 1.0/(1.0+\exp((V_m+49.0)/13.0)) \\ Tq &= 6.06 + 39.102/((0.57*\exp(-0.08*(V_m+44.0))+0.065*\exp(0.1*(V_m+45.93))) \\ dq/dt &= (qi - q) * Tq \\ ri &= 1.0/(1.0+\exp(-(V_m-19.3)/15.0)) \\ Tr &= 2.75352 + 14.40516/((1.037*\exp(0.09*(V_m+30.61))+0.369*\exp(-0.12*(V_m+23.84))) \\ dr/dt &= (ri - r) * Tr \\ EK &= 26.7266*\log(K_I / K_C) \\ I_{to} &= C_m * 0.252 * (V_m - EK)*q*r \\ I_{ss} &= C_m * 0.02 * (V_m - EK)*r \\ I_{4AP} &= I_{to} + I_{ss} \end{aligned}$$

Na/Ca exchanger current ( $I_{NCX}$ ) [15,13]

$$\begin{aligned} do &= 1.0 + (Ca_I/3.663)*2.0 + (Na_I/1628.0)*(1.0+(Na_I/561.4)*(1.0+Na_I/4.663)) \\ di &= 1.0 + (Ca_S/0.0207)*(1.0+\exp(-0.1369*V_m/26.72655)+Na_C/26.44) \\ &\quad + (Na_C/395.3)*(1.0+(Na_S/2.289)*(1.0+Na_C/26.44)) \\ k_{12} &= (Ca_S/0.0207)*\exp(-0.1369*V_m/26.72655) / di; \\ k_{14} &= (Na_C/395.2)*(Na_C/2.289)*(1.0+Na_C/26.44)*\exp(0.4315*V_m/(2*26.72655))/di; \\ k_{21} &= (Ca_I/3.663) / do; \\ k_{23} &= (Na_I/1628.0)*(Na_I/561.4)*(1.0+Na_I/4.663)*\exp(-0.4315*V_m/(2*26.72655))/do; \\ k_{32} &= \exp(0.4315*V_m/(2*26.72655)); \\ k_{34} &= Na_I/(4.663+Na_I); \\ k_{41} &= \exp(-0.4315*V_m/(2*26.72655)); \\ k_{43} &= Na_C/(26.44+Na_C); \\ x_1 &= k_{34}*k_{41}*(k_{23}+k_{21}) + k_{21}*k_{32}*(k_{43}+k_{41}); \\ x_2 &= k_{43}*k_{32}*(k_{14}+k_{12}) + k_{41}*k_{12}*(k_{34}+k_{32}); \\ x_3 &= k_{43}*k_{14}*(k_{23}+k_{21}) + k_{12}*k_{23}*(k_{43}+k_{41}); \\ x_4 &= k_{34}*k_{23}*(k_{14}+k_{12}) + k_{21}*k_{14}*(k_{34}+k_{32}); \\ I_{NCX} &= C_m * 187.5 * (k_{21}*x_2-k_{12}*x_1)/(x_1+x_2+x_3+x_4); \end{aligned}$$


---

---

|                                                                                                     |
|-----------------------------------------------------------------------------------------------------|
| Na/K pump current ( $I_{NaK}$ ) [15,13]                                                             |
| $ENa = 26.7266 * \log(Na_I / Na_C)$                                                                 |
| $aNaK = 1.0 / (1.0 + (1.4 / K_I)^{1.2})$                                                            |
| $bNaK = 1.0 / (1.0 + (14.0 / Na_C)^{1.3})$                                                          |
| $cNaK = 1.0 / (1.0 + \exp(-(V_m - ENa + 120.0) / 30.0))$                                            |
| $I_{NaK} = C_m * 2.88 * aNaK * bNaK * cNaK$                                                         |
| ryanodine receptors $Ca^{2+}$ release flux ( $J_{rel}$ )                                            |
| $Y = 1.0 - 0.0005 * \exp(Ca_S / 0.0002 - 1.0) - 0.00001 * \exp(Ca_J / 0.5 - 1.0)$                   |
| for (i=1 ; i<=nrr ; i++) {                                                                          |
| if ( $rE > Y$ ) { $rP = 0.5 * Y$ ; $drE/dt = (rP - rE)$ ; }                                         |
| else if ( $rE < 0.7$ ) { $rP = \text{rand}(0,1)$ ; $rE = 0.95 * Y$ ; }                              |
| else { $drP/dt = 30.0 * rP * (1.0 - rP) * (rP - Y)$ ; $drE/dt = 0.1 * (rP - rE)$ ; }                |
| if ( $rP > Y$ ) { $count++$ ; } }                                                                   |
| $RyR = count / nrr$ ;                                                                               |
| $J_{rel} = count * 0.60 * (Ca_J - Ca_S) / 0.6 / (2.0 * F * V_{siv})$                                |
| SERCa pump $Ca^{2+}$ uptake flux from cytosol to NSR ( $J_{sru}$ )                                  |
| $J_{sru} = 0.012 * (Ca_C / 0.000139 - Ca_N / 1.706052) / (1.0 + Ca_C / 0.000139 + Ca_N / 1.706052)$ |
| $Na^+$ background current ( $I_{bNa}$ ) [15,13] $ENa =$                                             |
| $26.7266 * \log(Na_I / Na_C)$                                                                       |
| $I_{bNa} = C_m * 0.00486 * (V_m - ENa)$                                                             |
| $Ca^{2+}$ background current ( $I_{bCa}$ ) [15,13]                                                  |
| $I_{bCa} = C_m * 0.0006 * (V_m - 45.0)$                                                             |
| $Ca^{2+}$ transfer rate from subspace to cytosol ( $J_{diff}$ ) [15,13]                             |
| $J_{diff} = (Ca_S - Ca_C) / 0.04$                                                                   |
| $Ca^{2+}$ transfer rate from NSR to JSR ( $J_{tra}$ ) [15,13]                                       |
| $J_{tra} = (Ca_N - Ca_J) / 40.0$                                                                    |
| $Ca^{2+}$ buffering : Fraction of Calmodulin and $Ca^{2+}$ complex in cytosol ( $fCMi$ ) [15,13]    |
| $dfCMi/dt = 227.7 * Ca_C * (1.0 - fCMi) - 0.542 * fCMi$                                             |
| $Ca^{2+}$ buffering : Fraction of Calmodulin and $Ca^{2+}$ complex in subspace ( $fCMs$ ) [15,13]   |
| $dfCMs/dt = 227.7 * Ca_S * (1.0 - fCMs) - 0.542 * fCMs$                                             |
| $Ca^{2+}$ buffering : Fraction of Toponin_Ca and $Ca^{2+}$ complex in cytosol ( $fTC$ ) [15,13]     |
| $dfTC/dt = 88.8 * Ca_C * (1.0 - fTC) - 0.446 * fTC$                                                 |
| $Ca^{2+}$ buffering : Fraction of Toponin_Mg and $Ca^{2+}$ complex in cytosol ( $fTMC$ ) [15,13]    |
| $dfTMC/dt = 227.7 * Ca_C * (1.0 - fTMC) - 0.00751 * fTMC$                                           |
| $Ca^{2+}$ buffering : Fraction of Toponin_Mg and $Mg^{2+}$ complex in cytosol ( $fTMM$ ) [15,13]    |
| $dfTMM/dt = 2.277 * Mg_C * (1.0 - fTMM) - 0.751 * fTMM$                                             |
| $Ca^{2+}$ buffering : Fraction of Calsequestrin and $Ca^{2+}$ complex in JSR ( $fCQ$ ) [15,13]      |
| $dfCQ/dt = 0.534 * Ca_J * (1.0 - fCQ) - 0.445 * fCQ$                                                |

---

Table S3. continued

---

Mass ballance:  $K^+$  concentration in cytosol ( $K_C$ )

$$dK_C/dt = -(I_{Kr} + I_{KS} + I_{to} + I_{SS} + I_{fK} - 2 * I_{NaK}) / (F * V_C)$$

Mass ballance:  $Ca^{2+}$  concentration in cytosol ( $Ca_C$ )

$$dCa_C/dt = (J_{diff} * V_{sub} - J_{sru} * V_{NSR}) / V_{cyt} \\ - (CM_{tot} * fCMi + TC_{tot} * fTC + TMC_{tot} * fTMC)$$

Mass ballance:  $Ca^{2+}$  concentration in subspace ( $Ca_S$ )

$$dCa_S/dt = J_{rel} * V_{jsr} / V_{sub} \\ - (I_{LCa} + I_{TCa} + I_{bCa} - 2 * I_{NCX}) / (2 * F * V_{sub}) - (J_{diff} + CM_{tot} * fCMS)$$

Mass ballance:  $Ca^{2+}$  concentration in NSR ( $Ca_N$ )

$$dCa_N/dt = J_{sru} - J_{trd} * V_{jsr} / V_{NSR}$$

Mass ballance:  $Ca^{2+}$  concentration in JSR ( $Ca_J$ )

$$dCa_J/dt = J_{trd} - J_{rel} - CQ_{tot} * fCQ$$

Mass ballance:  $Na^+$  concentration in cytosol ( $Na_C$ )

$$dNa_C/dt = -(I_{fNa} + I_{st} + I_{bNa} + 3 * I_{NCX} + 3 * I_{NaK}) / (F * V_C)$$


---

Supplementary information Figure S1 illustrates four divided intracellular spaces (subspace, cytosol, the network sarcoplasmic reticulum, and the junctional sarcoplasmic reticulum) and an arrangement of the more than 10 types of ion channel, the pumps, and the exchanger.

Table S4. Patient physical properties and treatment conditions

|                                      |                |
|--------------------------------------|----------------|
| Total body fluid volume              | 38.40 L        |
| Plasma fluid volume ( $V_P$ )        | 2.16 L         |
| Interstitial fluid volume ( $V_I$ )  | 11.04 L        |
| Intracellular fluid volume ( $V_C$ ) | 25.20 L        |
| Ultrafiltration volume               | 10.0 mL/min    |
| Plasma refilling rate                | 10.0 mL/min    |
| Blood flow rate in dialyzer          | 200.0 mL/min   |
| Dialysis fluid flow rate in dialyzer | 500.0 mL/min   |
| Hematocrit                           | 35 %           |
| Treatment time                       | 4.0 hour       |
| The number of treatments             | 3 times / week |

- [13] Kurata, Y.; Hisatome, I.; Imanishi, S.; Shibamoto, T. Dynamical description of sinoatrial node pacemaking: improved mathematical model for primary pacemaker cell. *Am. J. Physiol. Heart. Circ. Physiol.* **2002**, 283, H2074–101.
- [14] Wilders, R. Computer modelling of the sinoatrial node. *Med. Biol. Eng. Comput.* **2007**, 45, 189–207.
- [15] Maltsev, V.A.; Lakatta, E.G. A novel quantitative explanation for the autonomic modulation of cardiac pacemaker cell automaticity via a dynamic system of sarcolemmal and intracellular proteins. *Am. J. Physiol. Heart. Circ. Physiol.* 2010, 298, H2010–23.
